# Supplementary material
Source: Springer Nature journal article supplement (https://www.springermedizin.de/resource/supplementary/12936_2012_2155_MOESM4_ESM.pdf/9542752)

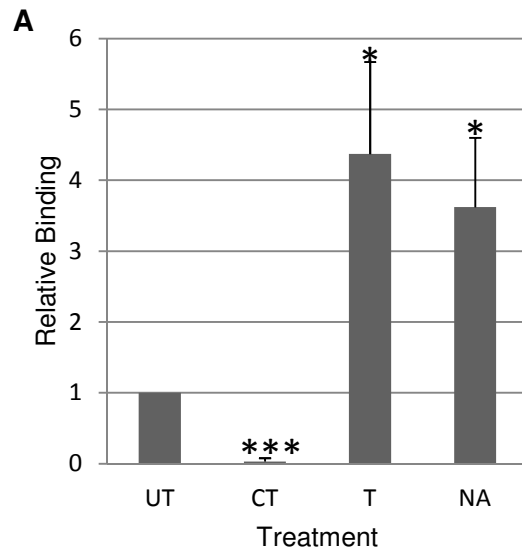

**B**

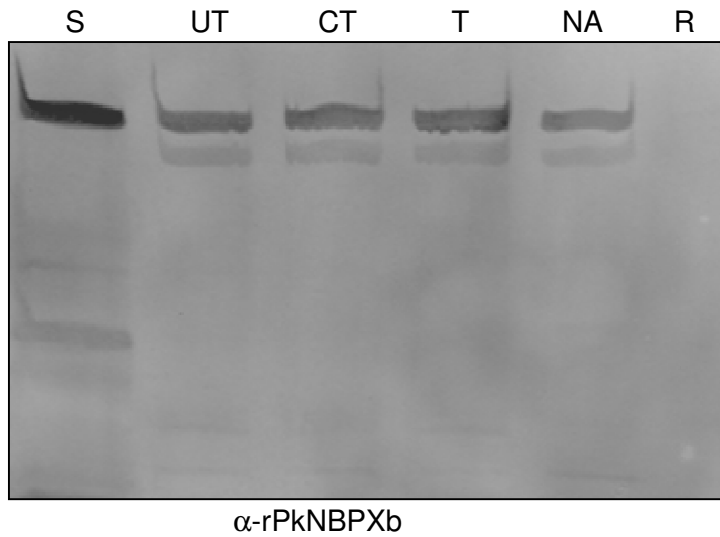

**C**

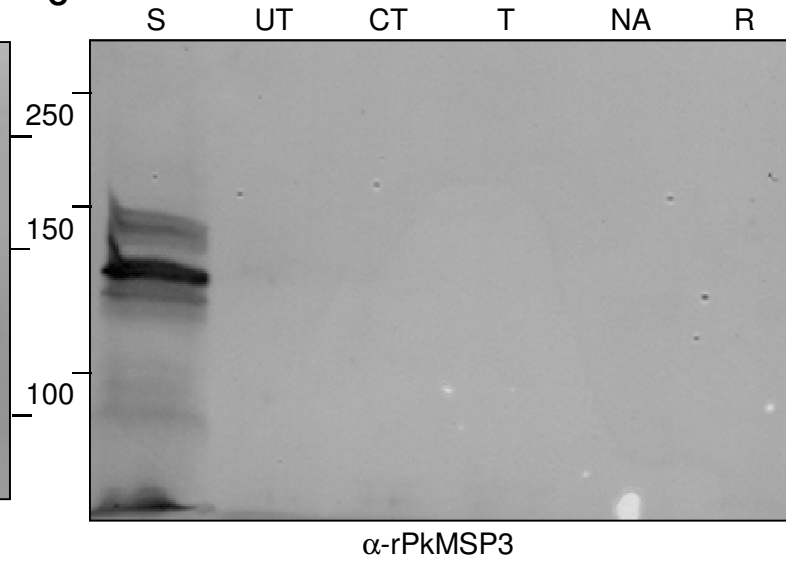

Supplement: MOESM4 [file 9542752]
